# Supplementary material for: A One-Step PCR-Based Assay to Evaluate the Efficiency and Precision of Genomic DNA-Editing Tools
Source: PubMed Central journal article supplement — Mol Ther Methods Clin Dev. 2017 Mar 8;5:43–50. doi: 10.1016/j.omtm.2017.03.001 (PMC5415314; doi:10.1016/j.omtm.2017.03.001), 2017-03-08
Supplement: mmc1.pdf [file mmc1.pdf]

**OMTM, Volume 5**

**Supplemental Information**

**A One-Step PCR-Based Assay  
to Evaluate the Efficiency and Precision  
of Genomic DNA-Editing Tools**

**Diego Germini, Yara Bou Saada, Tatiana Tsfasman, Kristina Osina, Chloé Robin, Nikolay Lomov, Mikhail Rubtsov, Nikolajs Sjakste, Marc Lipinski, and Yegor Vassetzky**

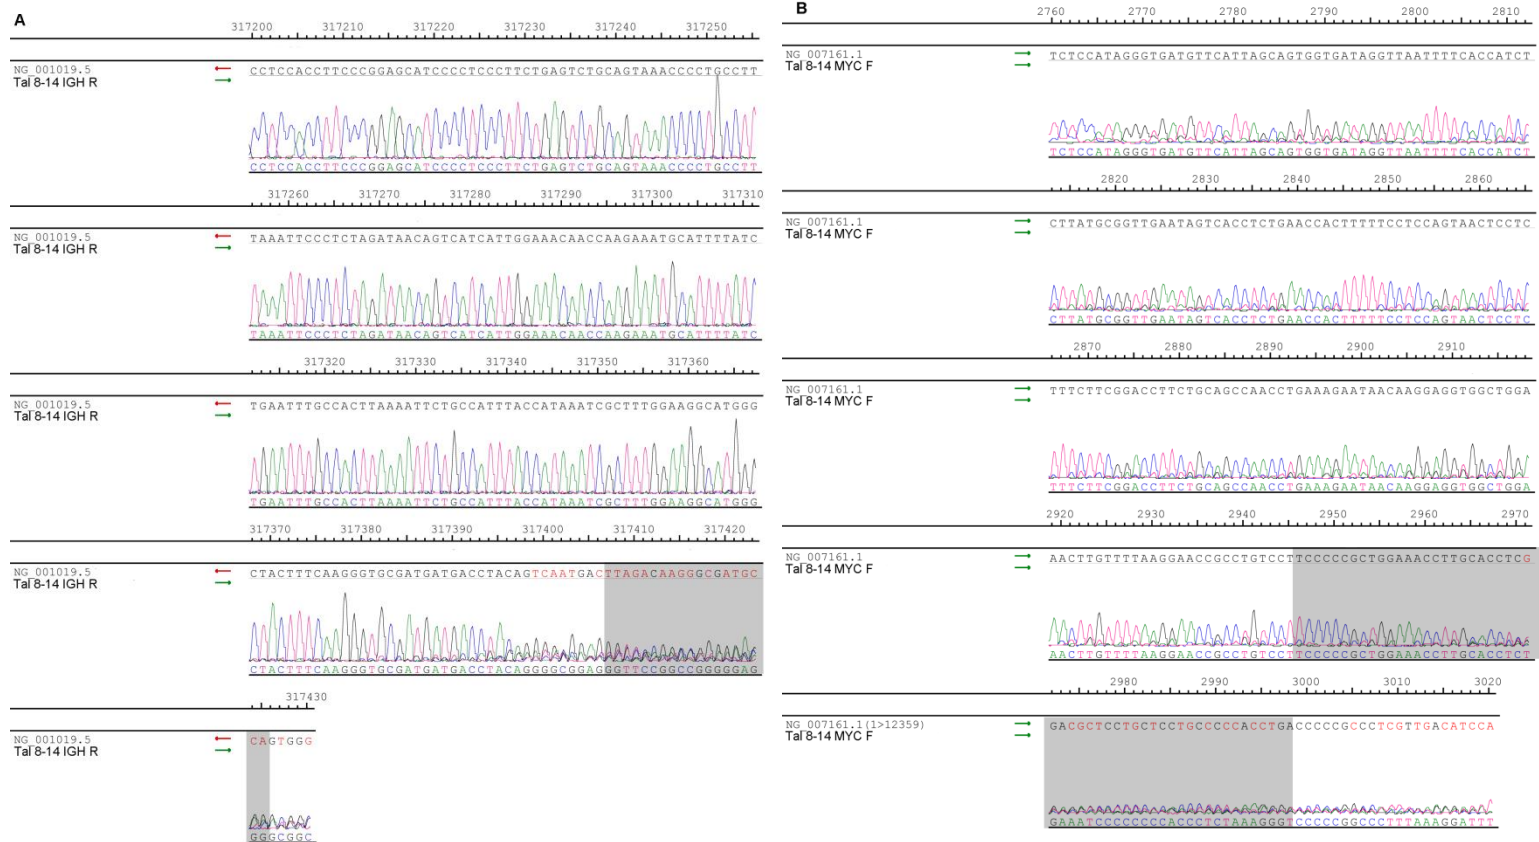

**Supplementary Figure 1. PCR detection of rearranged DNA sequence resulting from t(8;14) chromosomal translocation.**

Alignment of *IGH* (A) or *MYC* (B) wild types sequences (NG\_001019.5 and NG\_007161.1, respectively) with the sequence of the amplicon obtained from DNA extracted from transfected HeLa cells and amplified with MYC F + IGH R primers. In red are highlighted the mismatches between the two sequences and in grey is highlighted the sequence recognized by the TALENs.

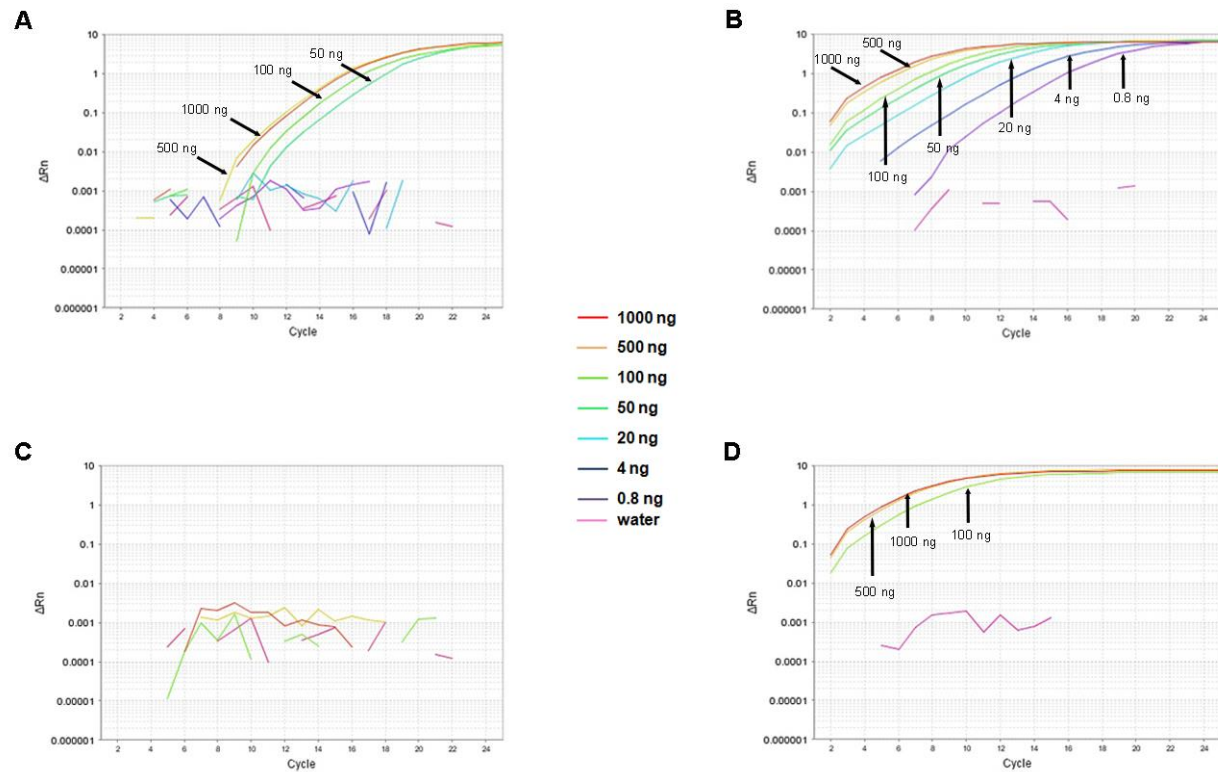

### Supplementary Figure 2. Nested qPCR analysis of ENIT sensitivity.

Amplification plots of the second step of a nested PCR of serially diluted DNA extracted from TAL8/14-transfected HeLa (10% transfection efficiency) or non-transfected HeLa and amplified in PCR1 with MYC F + IGH R primers or MYC F + MYC R primers, and with the corresponding internal primers in PCR2 (MYC\_in F + IGH\_in R primers or MYC\_in F + MYC\_in R primers, respectively). Water was used for negative control of amplification. X-axis: number of PCR cycles; Y axis: the magnitude of the fluorescence signal generated during the PCR over time ( $\Delta R_n$ ).

**a.** PCR2 amplification curves: DNA from TAL8/14-transfected HeLa cells, amplified with mixed MYC F + IGH R primers in PCR1 and MYC\_in F + IGH\_in R primers in PCR2; **b.** PCR2 amplification curves: DNA from TAL8/14-transfected HeLa cells, amplified with control MYC F + MYC R primers in PCR1 and MYC\_in F + MYC\_in R primers in PCR2; **c.** PCR2 amplification curves: DNA from untransfected HeLa cells, amplified with mixed MYC F + IGH R primers in PCR1 and MYC\_in F + IGH\_in R primers in PCR2; **d.** PCR2 amplification curves: DNA from untransfected HeLa cells, amplified with control MYC F + MYC R primers in PCR1 and MYC\_in F + MYC\_in R primers in PCR2.

The experiment was performed at least three times, and every sample was run in triplicate for both PCR2 and PCR1.

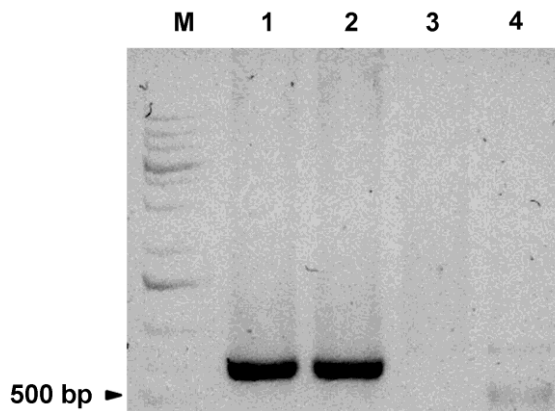

**Supplementary Figure 3. Nested ENIT can be used to detect the efficiency of various gene editing tools in different cell types**

PCR on DNA extracted from MRC 5 cells transformed with SV40 and transfected or not with the four TALENS recognizing the MYC and IGH regions. The represented amplicons were obtained using the following primer pairs and samples: *Lane 1* - transfected cells MYC F+R, *Lane 2* - transfected cells IGH F+R, *Lane 3* untransfected cells MYC F+ IGH R, *Lane 4* transfected cells MYC F + IGH R. M is the molecular weight marker.

**Supplementary table 1. Sensitivity of the existing methods for testing engineered nucleases efficiency**

| Method   | Minimal amount of DNA required for detection, ng | Minimal number of cells required for detection | Reference      |
|----------|--------------------------------------------------|------------------------------------------------|----------------|
| T7       | 100-800 ng                                       | 15,000-120,000                                 | <sup>1-4</sup> |
| Surveyor | 50 -200ng                                        | 7,500-30,000                                   | <sup>5-6</sup> |
| RE-PCR   | 500 ng                                           | 75000                                          | <sup>7</sup>   |

**Supplementary references:**

1. <https://www.neb.com/protocols/2014/08/11/determining-genome-targeting-efficiency-using-t7-endonuclease-i>).
2. Sedlak, RH, Liang, S, Niyonzima, N, De Silva Felixge, HS, Roychoudhury, P, Greninger, AL, *et al.* (2016). Digital detection of endonuclease mediated gene disruption in the HIV provirus. *Sci. Rep.* 6: 20064.
3. Fu, Y, Sander, JD, Reyon, D, Cascio, VM and Joung, JK (2014). Improving CRISPR-Cas nuclease specificity using truncated guide RNAs. *Nat Biotechnol* 32: 279–284.
4. Hou, P, Chen, S, Wang, S, Yu, X, Chen, Y, Jiang, M, *et al.* (2015). Genome editing of CXCR4 by CRISPR/cas9 confers cells resistant to HIV-1 infection. *Sci. Rep.* 5: 15577.
5. <http://www.idtdna.com/pages/docs/default-source/user-guides-and-protocols/userguide-surveyor-standard.pdf>
6. Qiu, P, Shandilya, H, D'Alessio, JM, O'Connor, K, Durocher, J and Gerard, GF (2004). Mutation detection using Surveyor<sup>TM</sup> nuclease. *Biotechniques* 36: 702–707.
7. Xie, K and Yang, Y (2013). RNA-Guided genome editing in plants using a CRISPR-Cas system. *Mol. Plant* 6: 1975–1983.
